# Supplementary material
Source: Research Square preprint supplement (doi:10.21203/rs.3.rs-9898082/v1)
Supplement: Supplementary file 1 [file f335ece58baf71b840c10d8b.docx]

**Supplementary**

**List of variables and its sources**

| **Variable Code** | **Full Name / Description** | **Source (Dataset)** | **Resolution** | **Category** |
| --- | --- | --- | --- | --- |
| **bio1** | Annual Mean Temperature | WorldClim v2 | 1 km | Bioclimatic |
| **bio2** | Mean Diurnal Range | WorldClim v2 | 1 km | Bioclimatic |
| **bio3** | Isothermality | WorldClim v2 | 1 km | Bioclimatic |
| **bio4** | Temperature Seasonality | WorldClim v2 | 1 km | Bioclimatic |
| **bio5** | Max Temperature of Warmest Month | WorldClim v2 | 1 km | Bioclimatic |
| **bio6** | Min Temperature of Coldest Month | WorldClim v2 | 1 km | Bioclimatic |
| **bio7** | Temperature Annual Range | WorldClim v2 | 1 km | Bioclimatic |
| **bio8** | Mean Temperature of Wettest Quarter | WorldClim v2 | 1 km | Bioclimatic |
| **bio9** | Mean Temperature of Driest Quarter | WorldClim v2 | 1 km | Bioclimatic |
| **bio10** | Mean Temperature of Warmest Quarter | WorldClim v2 | 1 km | Bioclimatic |
| **bio11** | Mean Temperature of Coldest Quarter | WorldClim v2 | 1 km | Bioclimatic |
| **bio12** | Annual Precipitation | WorldClim v2 | 1 km | Bioclimatic |
| **bio13** | Precipitation of Wettest Month | WorldClim v2 | 1 km | Bioclimatic |
| **bio14** | Precipitation of Driest Month | WorldClim v2 | 1 km | Bioclimatic |
| **bio15** | Precipitation Seasonality | WorldClim v2 | 1 km | Bioclimatic |
| **bio16** | Precipitation of Wettest Quarter | WorldClim v2 | 1 km | Bioclimatic |
| **bio17** | Precipitation of Driest Quarter | WorldClim v2 | 1 km | Bioclimatic |
| **bio18** | Precipitation of Warmest Quarter | WorldClim v2 | 1 km | Bioclimatic |
| **bio19** | Precipitation of Coldest Quarter | WorldClim v2 | 1 km | Bioclimatic |
| **aspect** | Terrain Aspect | SRTM/Derived | 30 m | Topographic |
| **canopy** | Forest Canopy Cover | MODIS | 30 m – 1 km | Vegetation |
| **D_PA** | Distance to Protected Areas | Custom | 1 km | Conservation |
| **D_Road** | Distance to Roads | OpenStreetMap | 1 km | Anthropogenic |
| **D_sett** | Distance to Human Settlements | GHSL / Custom | 1 km | Anthropogenic |
| **dsnow** | Duration of Snow Cover | MODIS Snow | 500 m–1 km | Climate |
| **elev** | Elevation | SRTM | 30 m | Topographic |
| **forest class** | Forest Classification | ESA Land Cover / Custom | 100 m | Land Cover |
| **forest cover** | Forest Cover Fraction | MODIS | 250 m – 1km km | Land Cover |
| **HMI** | Human Modification Index | NASA SEDAC | 1 km | Anthropogenic |
| **LPI** | Landscape Pattern Index | Fragstats / Custom | 1 km | Landscape |
| **ndvi** | Normalized Difference Vegetation Index | MODIS | 250 m | Vegetation |
| **NL** | Nighttime Lights Intensity | VIIRS | 500 m–1 km | Anthropogenic |
| **pop_den** | Population Density | WorldPop | 1 km | Socio-environmental |
| **TRI** | Terrain Ruggedness Index | Derived from SRTM | 30 m | Topographic |
| **VRM** | Vector Ruggedness Measure | Derived from DEM | 30 m | Topographic |
| **water bodies** | Distance to Water Bodies | HydroSHEDS / OSM | 1 km | Hydrological |

**Variable selection**


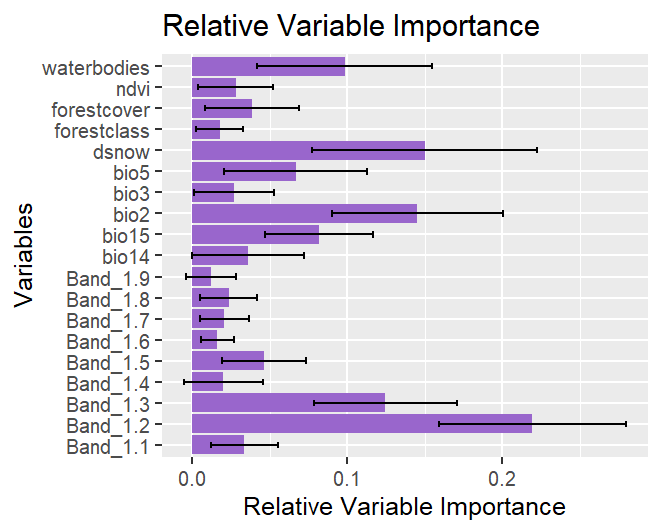
Fig: 01 showing the results of variation impact factor
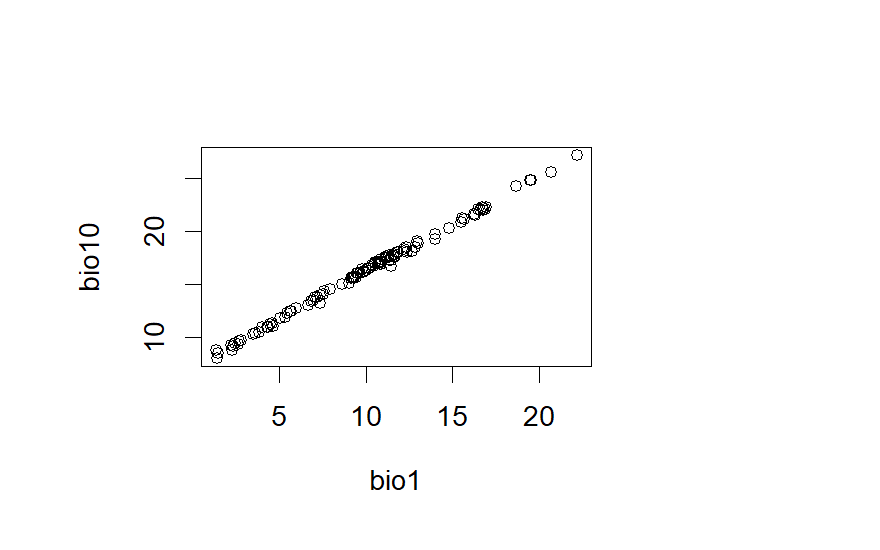


Fig 0.2: Showing the Distribution of Presence points against the variables.

**Model performance and selection Table 02.**

class : sdmModels

========================================================

number of species : 1

number of modelling methods : 6

names of modelling methods : gam, glm, mars, maxent, brt, rf

replicate. methods (data partitioning): subsampling, cross validation, bootstrap

number of replicates (each method) : 3

toral number of replicates per model: 21 (per species)

test percentage (in subsampling) : 30

------------------------------------------

model run success percentage (per species):

------------------------------------------

method btt

----------------------

gam : 100 %

glm : 100 %

mars : 100 %

maxent : 100 %

brt : 100 %

rf : 100 %

###################################################################

model Mean performance (per species), using test dataset (generated using partitioning):

-------------------------------------------------------------------------------

## species : btt

=========================

methods : AUC | COR | TSS | Deviance

-------------------------------------------------------------------------

gam : 0.87 | 0.6 | 0.65 | 2.12

glm : 0.89 | 0.61 | 0.66 | 0.49

mars : 0.88 | 0.61 | 0.66 | 0.57

maxent : 0.9 | 0.62 | 0.69 | 0.48

brt : 0.91 | 0.67 | 0.68 | 0.48

rf : 0.92 | 0.73 | 0.73 | 0.37

**Best Fit model Details**


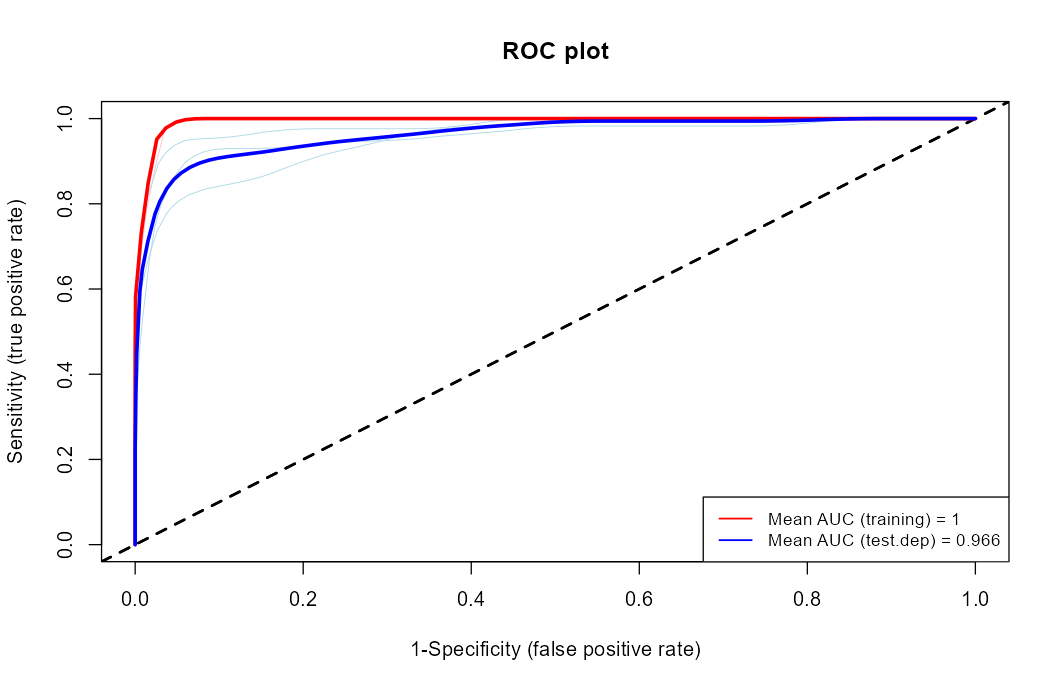


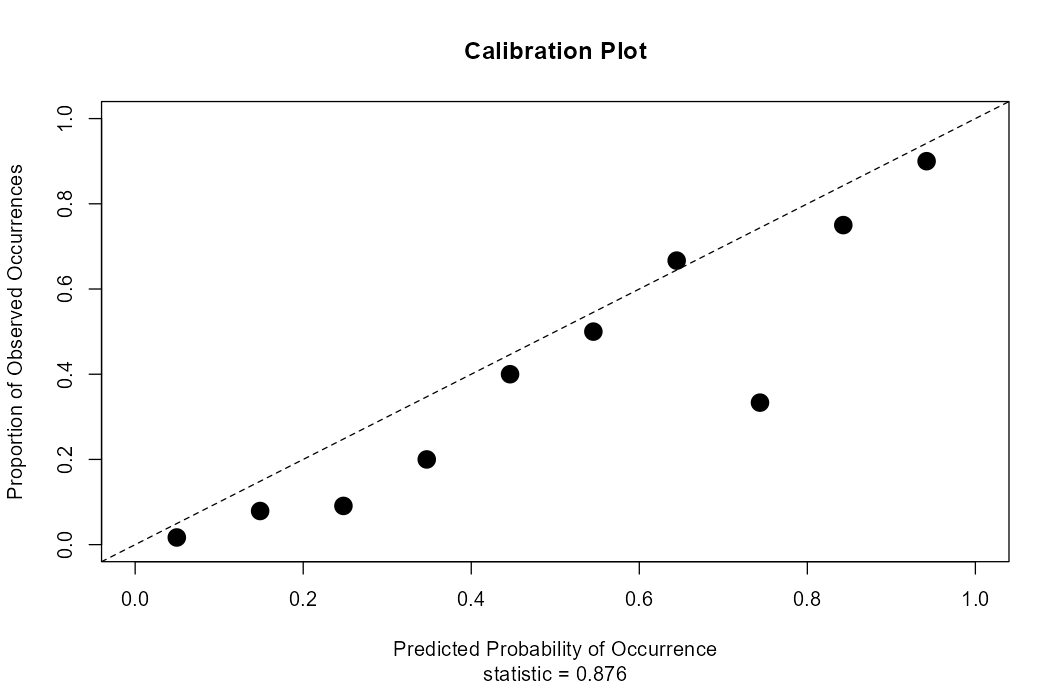


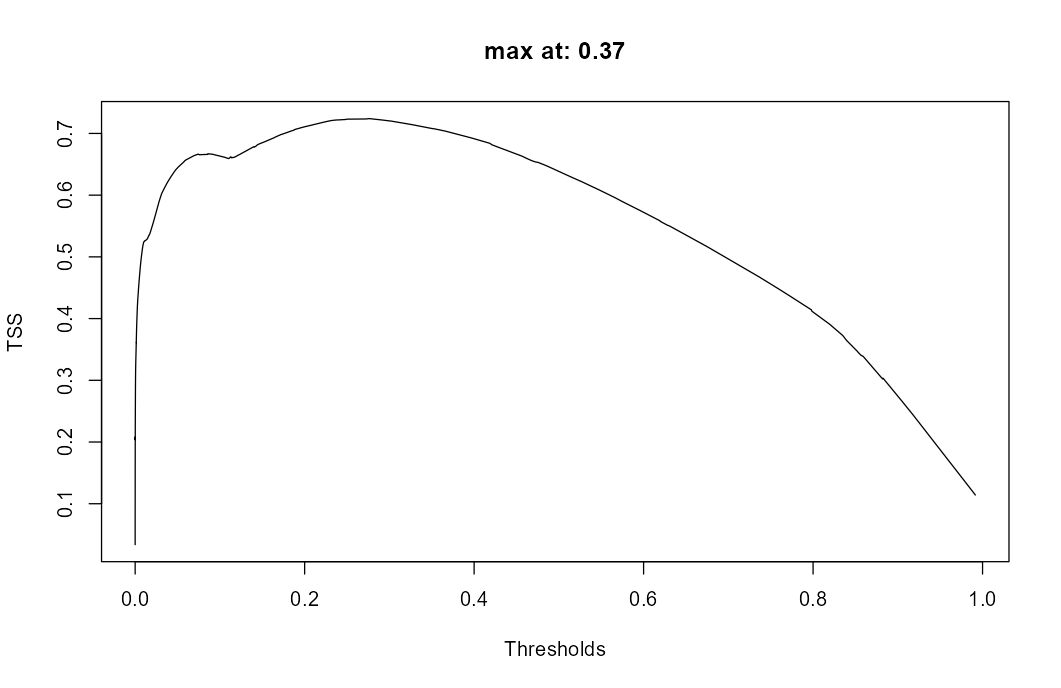


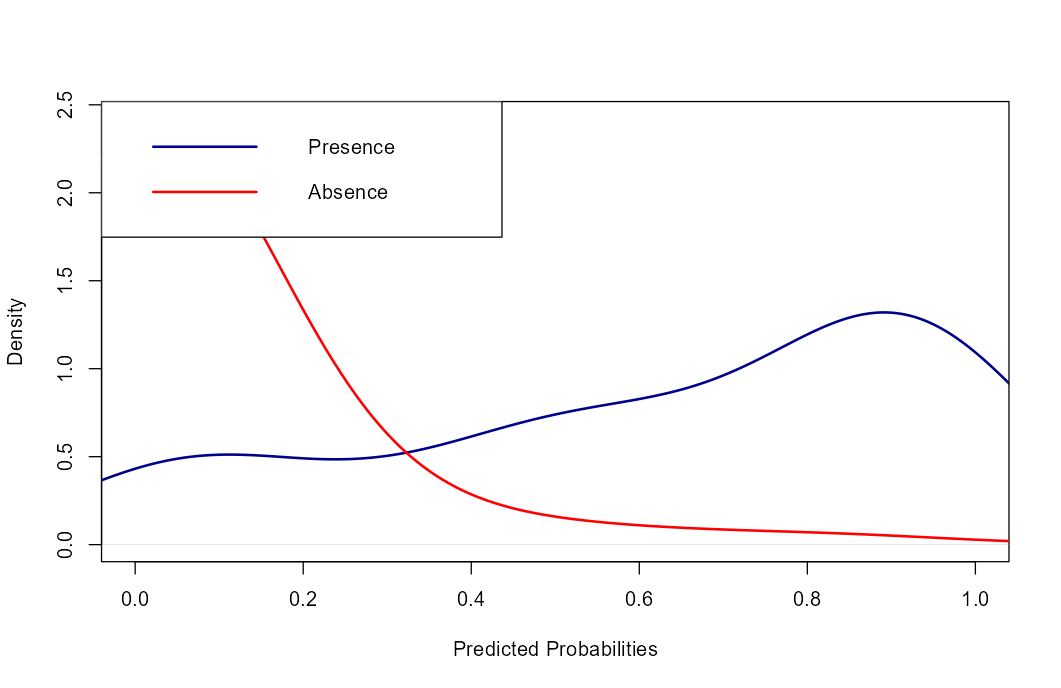

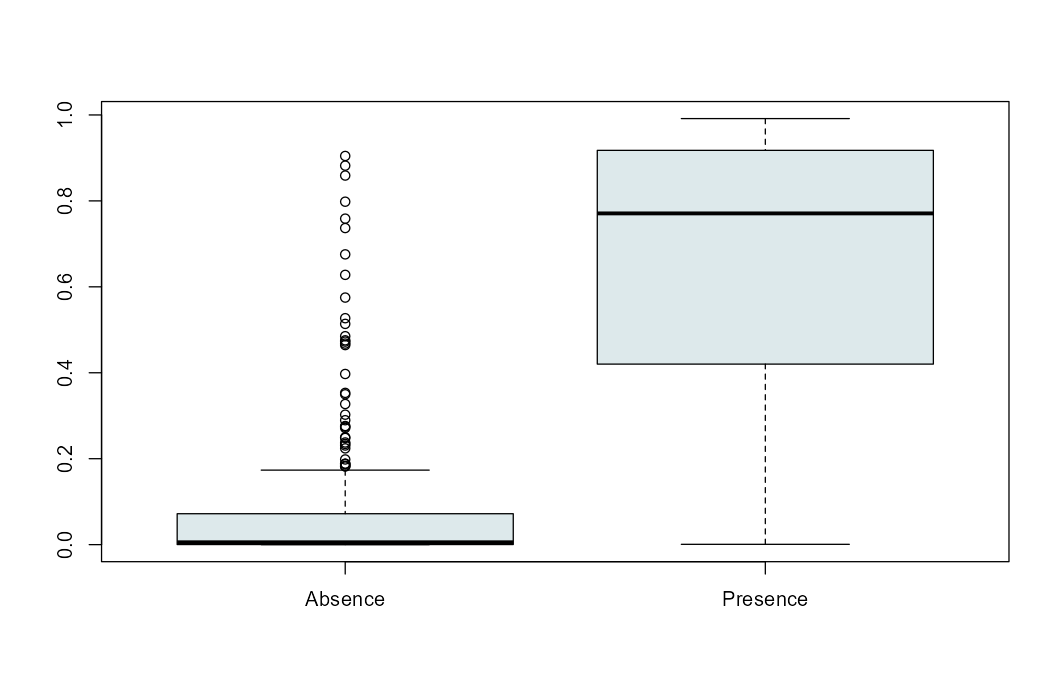


**Model Evaluation Table 03:**

| **Sl.no.** | **modelID** | **AUC** | **COR** | **Deviance** | **TSS** | **MCC** | **F1** |
| --- | --- | --- | --- | --- | --- | --- | --- |
| 1 | 126 | 0.985 | 0.873 | 0.200274 | 0.9385 | 0.9105 | 0.9195 |
| 2 | 121 | 0.968 | 0.781 | 0.291193 | 0.84 | 0.6136 | 0.619 |
| 3 | 117 | 0.965 | 0.822 | 0.268492 | 0.8069 | 0.7506 | 0.7797 |
| 4 | 75 | 0.961 | 0.722 | 0.410972 | 0.8309 | 0.6805 | 0.7042 |
| 5 | 124 | 0.96 | 0.827 | 0.288902 | 0.8871 | 0.8252 | 0.848 |
| 6 | 96 | 0.959 | 0.821 | 0.378495 | 0.8219 | 0.797 | 0.8214 |
| 7 | 76 | 0.955 | 0.687 | 0.422667 | 0.7839 | 0.6365 | 0.6667 |
| 8 | 118 | 0.954 | 0.794 | 0.303587 | 0.8169 | 0.7808 | 0.807 |
| 9 | 125 | 0.954 | 0.798 | 0.319837 | 0.7929 | 0.7595 | 0.7931 |
| 10 | 33 | 0.951 | 0.76 | 0.334149 | 0.7889 | 0.646 | 0.6761 |
| 11 | 105 | 0.95 | 0.69 | 0.424679 | 0.7885 | 0.5598 | 0.5674 |
| 12 | 100 | 0.949 | 0.703 | 0.434962 | 0.7715 | 0.549 | 0.5618 |
| 13 | 97 | 0.948 | 0.749 | 0.434962 | 0.7798 | 0.7562 | 0.7857 |
| 14 | 122 | 0.946 | 0.732 | 0.334495 | 0.7362 | 0.5932 | 0.6286 |
| 15 | 17 | 0.941 | 0.697 | 0.38249 | 0.7812 | 0.6889 | 0.7213 |
| 16 | 95 | 0.939 | 0.726 | 0.452266 | 0.7548 | 0.6847 | 0.7213 |
| 17 | 84 | 0.938 | 0.641 | 0.428802 | 0.773 | 0.5566 | 0.5693 |
| 18 | 80 | 0.936 | 0.664 | 0.447022 | 0.7596 | 0.5926 | 0.6216 |
| 19 | 13 | 0.935 | 0.722 | 0.365464 | 0.7389 | 0.5618 | 0.5926 |
| 20 | 34 | 0.934 | 0.684 | 0.378417 | 0.7228 | 0.6724 | 0.7119 |
| 21 | 101 | 0.934 | 0.696 | 0.45116 | 0.6962 | 0.5278 | 0.5641 |
| 22 | 38 | 0.933 | 0.666 | 0.383397 | 0.7496 | 0.5762 | 0.6053 |
| 23 | 123 | 0.933 | 0.714 | 0.363213 | 0.7646 | 0.6011 | 0.6301 |
| 24 | 64 | 0.932 | 0.667 | 0.460083 | 0.7302 | 0.5264 | 0.5507 |
| 25 | 79 | 0.932 | 0.651 | 0.446459 | 0.6965 | 0.4675 | 0.4808 |
| 26 | 106 | 0.932 | 0.74 | 0.353936 | 0.757 | 0.6305 | 0.6667 |
| 27 | 12 | 0.929 | 0.711 | 0.398594 | 0.7378 | 0.7155 | 0.75 |
| 28 | 1 | 0.927 | 0.699 | 0.402968 | 0.7482 | 0.6879 | 0.7253 |
| 29 | 16 | 0.927 | 0.624 | 0.807515 | 0.7046 | 0.5119 | 0.5412 |
| 30 | 14 | 0.924 | 0.697 | 0.39761 | 0.7348 | 0.6372 | 0.6769 |
| 31 | 55 | 0.923 | 0.687 | 0.393169 | 0.6657 | 0.5968 | 0.6452 |
| 32 | 103 | 0.922 | 0.709 | 0.483293 | 0.7632 | 0.6381 | 0.6803 |
| 33 | 58 | 0.921 | 0.639 | 0.629039 | 0.6896 | 0.4932 | 0.5227 |
| 34 | 120 | 0.92 | 0.724 | 0.377501 | 0.7519 | 0.6211 | 0.6571 |
| 35 | 63 | 0.919 | 0.678 | 0.39983 | 0.7921 | 0.6425 | 0.6667 |
| 36 | 85 | 0.918 | 0.739 | 0.441952 | 0.6928 | 0.637 | 0.6813 |
| 37 | 116 | 0.918 | 0.734 | 0.369464 | 0.7319 | 0.5847 | 0.6216 |
| 38 | 18 | 0.916 | 0.625 | 0.419104 | 0.7312 | 0.5842 | 0.6197 |
| 39 | 119 | 0.916 | 0.74 | 0.363242 | 0.7498 | 0.6722 | 0.7097 |
| 40 | 71 | 0.915 | 0.603 | 0.479085 | 0.7159 | 0.5081 | 0.5319 |
| 41 | 104 | 0.915 | 0.668 | 0.525231 | 0.6701 | 0.618 | 0.6721 |
| 42 | 82 | 0.914 | 0.689 | 0.4571 | 0.7272 | 0.6543 | 0.7023 |
| 43 | 83 | 0.914 | 0.666 | 0.45462 | 0.7109 | 0.6065 | 0.6569 |
| 44 | 107 | 0.914 | 0.666 | 0.404887 | 0.678 | 0.4903 | 0.5255 |
| 45 | 22 | 0.913 | 0.676 | 0.409612 | 0.6838 | 0.5803 | 0.6275 |
| 46 | 24 | 0.912 | 0.673 | 0.421344 | 0.7258 | 0.5355 | 0.5649 |
| 47 | 56 | 0.912 | 0.645 | 0.44285 | 0.7389 | 0.5618 | 0.5926 |
| 48 | 98 | 0.911 | 0.716 | 0.461416 | 0.7069 | 0.5445 | 0.5823 |
| 49 | 74 | 0.908 | 0.611 | 0.487428 | 0.6959 | 0.4859 | 0.5102 |
| 50 | 43 | 0.907 | 0.711 | 0.426652 | 0.7249 | 0.6319 | 0.6735 |
| 51 | 61 | 0.907 | 0.666 | 0.678197 | 0.7257 | 0.5931 | 0.6405 |
| 52 | 87 | 0.907 | 0.69 | 0.475048 | 0.6814 | 0.4943 | 0.5294 |
| 53 | 90 | 0.907 | 0.653 | 0.48867 | 0.6898 | 0.5511 | 0.5946 |
| 54 | 35 | 0.906 | 0.655 | 0.422801 | 0.7298 | 0.6263 | 0.6667 |
| 55 | 77 | 0.906 | 0.631 | 0.506272 | 0.7219 | 0.568 | 0.6053 |
| 56 | 25 | 0.904 | 0.636 | 0.440134 | 0.7128 | 0.6466 | 0.6885 |
| 57 | 81 | 0.904 | 0.552 | 0.539215 | 0.6981 | 0.4836 | 0.5053 |
| 58 | 99 | 0.904 | 0.653 | 0.497147 | 0.6869 | 0.5158 | 0.5542 |
| 59 | 108 | 0.904 | 0.725 | 0.385765 | 0.6794 | 0.6053 | 0.6526 |
| 60 | 66 | 0.902 | 0.64 | 0.473279 | 0.6924 | 0.4947 | 0.5248 |
| 61 | 60 | 0.899 | 0.573 | 0.48938 | 0.6612 | 0.4803 | 0.5176 |
| 62 | 59 | 0.897 | 0.661 | 0.440366 | 0.6827 | 0.541 | 0.5833 |
| 63 | 4 | 0.896 | 0.64 | 0.466834 | 0.6878 | 0.5902 | 0.6364 |
| 64 | 67 | 0.896 | 0.622 | 0.470289 | 0.6848 | 0.5429 | 0.5867 |
| 65 | 109 | 0.896 | 0.71 | 0.394701 | 0.7007 | 0.6898 | 0.7273 |
| 66 | 37 | 0.895 | 0.608 | 0.534231 | 0.6692 | 0.5595 | 0.6061 |
| 67 | 32 | 0.894 | 0.641 | 0.509376 | 0.6957 | 0.6747 | 0.7143 |
| 68 | 40 | 0.894 | 0.637 | 0.552456 | 0.685 | 0.5598 | 0.6144 |
| 69 | 115 | 0.894 | 0.684 | 0.408788 | 0.7148 | 0.5959 | 0.6377 |
| 70 | 92 | 0.893 | 0.616 | 0.507934 | 0.6519 | 0.4713 | 0.5111 |
| 71 | 78 | 0.892 | 0.604 | 0.505422 | 0.6387 | 0.5942 | 0.6441 |
| 72 | 102 | 0.892 | 0.58 | 0.513944 | 0.6827 | 0.541 | 0.5833 |
| 73 | 29 | 0.891 | 0.571 | 0.466117 | 0.6119 | 0.4272 | 0.4694 |
| 74 | 41 | 0.89 | 0.598 | 0.561958 | 0.6609 | 0.5408 | 0.5986 |
| 75 | 88 | 0.89 | 0.627 | 0.53146 | 0.5846 | 0.5943 | 0.6415 |
| 76 | 52 | 0.888 | 0.648 | 0.480895 | 0.7719 | 0.6624 | 0.697 |
| 77 | 57 | 0.888 | 0.636 | 0.589138 | 0.6669 | 0.4895 | 0.5287 |
| 78 | 65 | 0.888 | 0.571 | 0.515688 | 0.6238 | 0.4809 | 0.5333 |
| 79 | 69 | 0.888 | 0.657 | 0.467987 | 0.6628 | 0.5428 | 0.5915 |
| 80 | 86 | 0.886 | 0.581 | 0.530228 | 0.6291 | 0.4293 | 0.4625 |
| 81 | 62 | 0.884 | 0.598 | 0.6367 | 0.6029 | 0.4624 | 0.5269 |
| 82 | 111 | 0.884 | 0.694 | 0.417046 | 0.6807 | 0.6333 | 0.678 |
| 83 | 113 | 0.881 | 0.649 | 0.431593 | 0.6307 | 0.5258 | 0.5797 |
| 84 | 8 | 0.879 | 0.552 | 0.627694 | 0.5998 | 0.4295 | 0.4783 |
| 85 | 39 | 0.879 | 0.545 | 0.490992 | 0.6227 | 0.4549 | 0.5 |
| 86 | 53 | 0.879 | 0.595 | 0.509668 | 0.5928 | 0.44 | 0.4941 |
| 87 | 23 | 0.877 | 0.585 | 0.549896 | 0.6084 | 0.498 | 0.5556 |
| 88 | 42 | 0.875 | 0.56 | 0.449815 | 0.6032 | 0.4865 | 0.5357 |
| 89 | 44 | 0.872 | 0.572 | 0.633074 | 0.6107 | 0.5286 | 0.5859 |
| 90 | 27 | 0.87 | 0.616 | 0.480082 | 0.6187 | 0.5483 | 0.6032 |
| 91 | 94 | 0.87 | 0.632 | 0.499264 | 0.6628 | 0.5428 | 0.5915 |
| 92 | 54 | 0.869 | 0.715 | 0.955491 | 0.7198 | 0.6057 | 0.6471 |
| 93 | 70 | 0.868 | 0.558 | 0.523024 | 0.5928 | 0.44 | 0.4941 |
| 94 | 19 | 0.867 | 0.74 | 4.423653 | 0.7524 | 0.747 | 0.7826 |
| 95 | 73 | 0.867 | 0.611 | 0.52659 | 0.6528 | 0.5257 | 0.5753 |
| 96 | 45 | 0.866 | 0.586 | 0.618122 | 0.6614 | 0.4711 | 0.507 |
| 97 | 2 | 0.865 | 0.568 | 0.892356 | 0.6305 | 0.4904 | 0.5424 |
| 98 | 50 | 0.864 | 0.523 | 0.596147 | 0.6198 | 0.4526 | 0.5 |
| 99 | 28 | 0.863 | 0.526 | 0.53012 | 0.603 | 0.3941 | 0.416 |
| 100 | 49 | 0.863 | 0.574 | 0.524197 | 0.6078 | 0.4592 | 0.5122 |
| 101 | 36 | 0.861 | 0.591 | 0.50392 | 0.6557 | 0.5747 | 0.625 |
| 102 | 46 | 0.861 | 0.621 | 0.526237 | 0.6498 | 0.491 | 0.5366 |
| 103 | 110 | 0.86 | 0.643 | 0.473839 | 0.6287 | 0.5703 | 0.623 |
| 104 | 10 | 0.859 | 0.598 | 0.637323 | 0.6769 | 0.5024 | 0.5412 |
| 105 | 31 | 0.857 | 0.59 | 0.506012 | 0.5837 | 0.4822 | 0.5429 |
| 106 | 15 | 0.855 | 0.577 | 0.618721 | 0.5937 | 0.4996 | 0.5588 |
| 107 | 20 | 0.853 | 0.662 | 5.310073 | 0.7057 | 0.6715 | 0.7179 |
| 108 | 112 | 0.853 | 0.623 | 0.477416 | 0.5676 | 0.6341 | 0.6667 |
| 109 | 72 | 0.851 | 0.483 | 0.571894 | 0.5687 | 0.458 | 0.5205 |
| 110 | 30 | 0.849 | 0.451 | 0.704762 | 0.5898 | 0.4186 | 0.4681 |
| 111 | 91 | 0.849 | 0.618 | 0.519703 | 0.5546 | 0.516 | 0.5763 |
| 112 | 5 | 0.847 | 0.514 | 0.578033 | 0.5548 | 0.3832 | 0.4356 |
| 113 | 93 | 0.847 | 0.595 | 0.535223 | 0.5276 | 0.5116 | 0.5714 |
| 114 | 3 | 0.844 | 0.565 | 1.464792 | 0.6073 | 0.5222 | 0.58 |
| 115 | 114 | 0.841 | 0.608 | 0.499214 | 0.5446 | 0.4941 | 0.5574 |
| 116 | 6 | 0.839 | 0.572 | 0.849223 | 0.6017 | 0.5672 | 0.6207 |
| 117 | 26 | 0.838 | 0.506 | 0.577716 | 0.5396 | 0.4837 | 0.5484 |
| 118 | 9 | 0.837 | 0.475 | 0.870728 | 0.5357 | 0.3912 | 0.4545 |
| 119 | 68 | 0.836 | 0.488 | 0.571578 | 0.5146 | 0.4373 | 0.5075 |
| 120 | 48 | 0.833 | 0.61 | 0.548573 | 0.6348 | 0.4712 | 0.5176 |
| 121 | 89 | 0.827 | 0.55 | 0.553814 | 0.518 | 0.3354 | 0.3662 |
| 122 | 21 | 0.825 | 0.647 | 4.578279 | 0.6754 | 0.6617 | 0.6977 |
| 123 | 51 | 0.818 | 0.5 | 0.71172 | 0.5269 | 0.3501 | 0.4 |
| 124 | 47 | 0.795 | 0.423 | 0.746791 | 0.4737 | 0.3392 | 0.413 |
| 125 | 11 | 0.736 | 0.368 | 9.124507 | 0.4535 | 0.4535 | 0.5185 |
| 126 | 7 | 0.713 | 0.366 | 10.90353 | 0.4356 | 0.3738 | 0.4545 |

**Model generation Table 04**

| Sl no. | Models generated | | |
| --- | --- | --- | --- |
| 1 | id_1__sp_btt__m_gam__re_subs | id_2__sp_btt__m_gam__re_subs | id_3__sp_btt__m_gam__re_subs |
| 4 | id_4__sp_btt__m_gam__re_cros | id_5__sp_btt__m_gam__re_cros | id_6__sp_btt__m_gam__re_cros |
| 7 | id_7__sp_btt__m_gam__re_cros | id_8__sp_btt__m_gam__re_cros | id_9__sp_btt__m_gam__re_cros |
| 10 | id_10__sp_btt__m_gam__re_cros | id_11__sp_btt__m_gam__re_cros | id_12__sp_btt__m_gam__re_cros |
| 13 | id_13__sp_btt__m_gam__re_cros | id_14__sp_btt__m_gam__re_cros | id_15__sp_btt__m_gam__re_cros |
| 16 | id_16__sp_btt__m_gam__re_cros | id_17__sp_btt__m_gam__re_cros | id_18__sp_btt__m_gam__re_cros |
| 19 | id_19__sp_btt__m_gam__re_boot | id_20__sp_btt__m_gam__re_boot | id_21__sp_btt__m_gam__re_boot |
| 22 | id_22__sp_btt__m_glm__re_subs | id_23__sp_btt__m_glm__re_subs | id_24__sp_btt__m_glm__re_subs |
| 25 | id_25__sp_btt__m_glm__re_cros | id_26__sp_btt__m_glm__re_cros | id_27__sp_btt__m_glm__re_cros |
| 28 | id_28__sp_btt__m_glm__re_cros | id_29__sp_btt__m_glm__re_cros | id_30__sp_btt__m_glm__re_cros |
| 31 | id_31__sp_btt__m_glm__re_cros | id_32__sp_btt__m_glm__re_cros | id_33__sp_btt__m_glm__re_cros |
| 34 | id_34__sp_btt__m_glm__re_cros | id_35__sp_btt__m_glm__re_cros | id_36__sp_btt__m_glm__re_cros |
| 37 | id_37__sp_btt__m_glm__re_cros | id_38__sp_btt__m_glm__re_cros | id_39__sp_btt__m_glm__re_cros |
| 40 | id_40__sp_btt__m_glm__re_boot | id_41__sp_btt__m_glm__re_boot | id_42__sp_btt__m_glm__re_boot |
| 43 | id_43__sp_btt__m_mars__re_subs | id_44__sp_btt__m_mars__re_subs | id_45__sp_btt__m_mars__re_subs |
| 46 | id_46__sp_btt__m_mars__re_cros | id_47__sp_btt__m_mars__re_cros | id_48__sp_btt__m_mars__re_cros |
| 49 | id_49__sp_btt__m_mars__re_cros | id_50__sp_btt__m_mars__re_cros | id_51__sp_btt__m_mars__re_cros |
| 52 | id_52__sp_btt__m_mars__re_cros | id_53__sp_btt__m_mars__re_cros | id_54__sp_btt__m_mars__re_cros |
| 55 | id_55__sp_btt__m_mars__re_cros | id_56__sp_btt__m_mars__re_cros | id_57__sp_btt__m_mars__re_cros |
| 58 | id_58__sp_btt__m_mars__re_cros | id_59__sp_btt__m_mars__re_cros | id_60__sp_btt__m_mars__re_cros |
| 61 | id_61__sp_btt__m_mars__re_boot | id_62__sp_btt__m_mars__re_boot | id_63__sp_btt__m_mars__re_boot |
| 64 | id_64__sp_btt__m_maxent__re_subs | id_65__sp_btt__m_maxent__re_subs | id_66__sp_btt__m_maxent__re_subs |
| 67 | id_67__sp_btt__m_maxent__re_cros | id_68__sp_btt__m_maxent__re_cros | id_69__sp_btt__m_maxent__re_cros |
| 70 | id_70__sp_btt__m_maxent__re_cros | id_71__sp_btt__m_maxent__re_cros | id_72__sp_btt__m_maxent__re_cros |
| 73 | id_73__sp_btt__m_maxent__re_cros | id_74__sp_btt__m_maxent__re_cros | id_75__sp_btt__m_maxent__re_cros |
| 76 | id_76__sp_btt__m_maxent__re_cros | id_77__sp_btt__m_maxent__re_cros | id_78__sp_btt__m_maxent__re_cros |
| 79 | id_79__sp_btt__m_maxent__re_cros | id_80__sp_btt__m_maxent__re_cros | id_81__sp_btt__m_maxent__re_cros |
| 82 | id_82__sp_btt__m_maxent__re_boot | id_83__sp_btt__m_maxent__re_boot | id_84__sp_btt__m_maxent__re_boot |
| 85 | id_85__sp_btt__m_brt__re_subs | id_86__sp_btt__m_brt__re_subs | id_87__sp_btt__m_brt__re_subs |
| 88 | id_88__sp_btt__m_brt__re_cros | id_89__sp_btt__m_brt__re_cros | id_90__sp_btt__m_brt__re_cros |
| 91 | id_91__sp_btt__m_brt__re_cros | id_92__sp_btt__m_brt__re_cros | id_93__sp_btt__m_brt__re_cros |
| 94 | id_94__sp_btt__m_brt__re_cros | id_95__sp_btt__m_brt__re_cros | id_96__sp_btt__m_brt__re_cros |
| 97 | id_97__sp_btt__m_brt__re_cros | id_98__sp_btt__m_brt__re_cros | id_99__sp_btt__m_brt__re_cros |
| 100 | id_100__sp_btt__m_brt__re_cros | id_101__sp_btt__m_brt__re_cros | id_102__sp_btt__m_brt__re_cros |
| 103 | id_103__sp_btt__m_brt__re_boot | id_104__sp_btt__m_brt__re_boot | id_105__sp_btt__m_brt__re_boot |
| 106 | id_106__sp_btt__m_rf__re_subs | id_107__sp_btt__m_rf__re_subs | id_108__sp_btt__m_rf__re_subs |
| 109 | id_109__sp_btt__m_rf__re_cros | id_110__sp_btt__m_rf__re_cros | id_111__sp_btt__m_rf__re_cros |
| 112 | id_112__sp_btt__m_rf__re_cros | id_113__sp_btt__m_rf__re_cros | id_114__sp_btt__m_rf__re_cros |
| 115 | id_115__sp_btt__m_rf__re_cros | id_116__sp_btt__m_rf__re_cros | id_117__sp_btt__m_rf__re_cros |
| 118 | id_118__sp_btt__m_rf__re_cros | id_119__sp_btt__m_rf__re_cros | id_120__sp_btt__m_rf__re_cros |
| 121 | id_121__sp_btt__m_rf__re_cros | id_122__sp_btt__m_rf__re_cros | id_123__sp_btt__m_rf__re_cros |
| 124 | id_124__sp_btt__m_rf__re_boot | id_125__sp_btt__m_rf__re_boot | id_126__sp_btt__m_rf__re_boot |


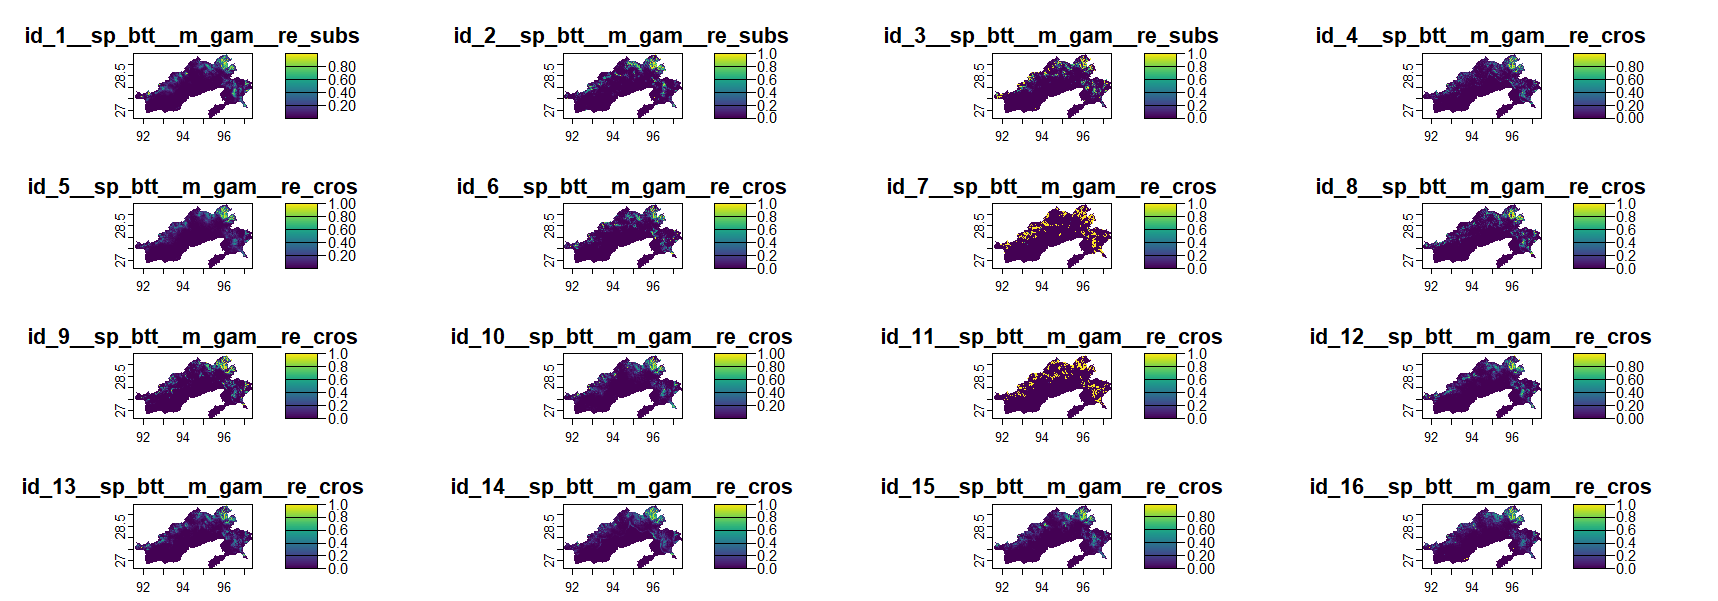


| Future  Scenario | loss_  km² | gain_  km² | stable_  presence  _km² | stable_  absence  _km² | Loss  pct | Gain  pct | net_  change  pct | stable_  presence  pct | net_  change  km² |
| --- | --- | --- | --- | --- | --- | --- | --- | --- | --- |
| ssp126.2021 | 0.53 | 4.32 | 42.73 | 48.53 | 1.23 | 9.99 | 8.76 | 98.77 | 3.79 |
| ssp245.2021 | 0.37 | 5.28 | 42.89 | 47.57 | 0.86 | 12.2 | 11.34 | 99.14 | 4.91 |
| ssp370.2021 | 1.23 | 2.52 | 42.03 | 50.33 | 2.85 | 5.82 | 2.97 | 97.15 | 1.28 |
| ssp585.2021 | 1.89 | 1.99 | 41.37 | 50.86 | 4.37 | 4.6 | 0.23 | 95.63 | 0.1 |
| ssp126.2041 | 2.39 | 1.21 | 40.87 | 51.64 | 5.52 | 2.8 | -2.72 | 94.48 | -1.18 |
| ssp245.2041 | 3.5 | 1.2 | 39.76 | 51.65 | 8.09 | 2.78 | -5.31 | 91.91 | -2.3 |
| ssp370.2041 | 1.59 | 3.33 | 41.67 | 49.52 | 3.67 | 7.69 | 4.02 | 96.33 | 1.74 |
| ssp585.2041 | 0.62 | 4.87 | 42.64 | 47.98 | 1.44 | 11.25 | 9.81 | 98.56 | 4.24 |
| ssp126.2061 | 3.74 | 0.75 | 39.52 | 52.1 | 8.65 | 1.74 | -6.91 | 91.35 | -2.99 |
| ssp245.2061 | 1.82 | 2.95 | 41.44 | 49.9 | 4.2 | 6.82 | 2.62 | 95.8 | 1.13 |
| ssp370.2061 | 1.11 | 4.83 | 42.15 | 48.02 | 2.56 | 11.16 | 8.6 | 97.44 | 3.72 |
| ssp585.2061 | 0.32 | 7.57 | 42.95 | 45.28 | 0.73 | 17.51 | 16.78 | 99.27 | 7.26 |
| ssp126.2081 | 1.72 | 0.98 | 41.54 | 51.87 | 3.98 | 2.27 | -1.71 | 96.02 | -0.74 |
| ssp245.2081 | 3.49 | 1.41 | 39.78 | 51.44 | 8.06 | 3.25 | -4.81 | 91.94 | -2.08 |
| ssp370.2081 | 0.99 | 5.27 | 42.27 | 47.58 | 2.29 | 12.18 | 9.89 | 97.71 | 4.28 |
| ssp585.2081 | 0.52 | 7.18 | 42.74 | 45.67 | 1.2 | 16.59 | 15.39 | 98.8 | 6.66 |

Table. 04: Habitat changes over the different ssp scenarios for different time period.
